# Supplementary material
Source: PubMed Central journal article supplement (PMC4196946)

# Supplementary Figure 3

**a**

*Shh*<sup>CreER/WT</sup>; *R26*<sup>mTmG/WT</sup>  
(BBN for 4 months; TM at 0 month)

H&E

mEGFP/mTomato

Bladder #1

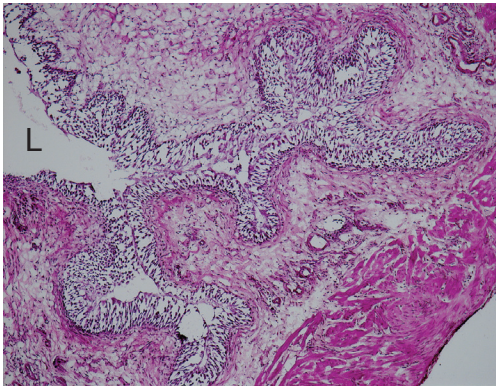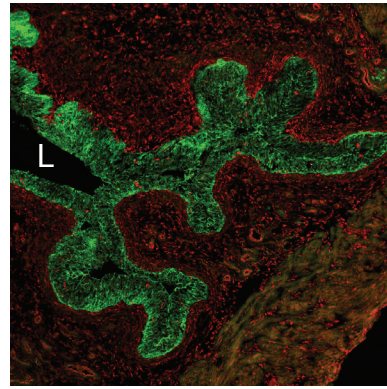

Bladder #2

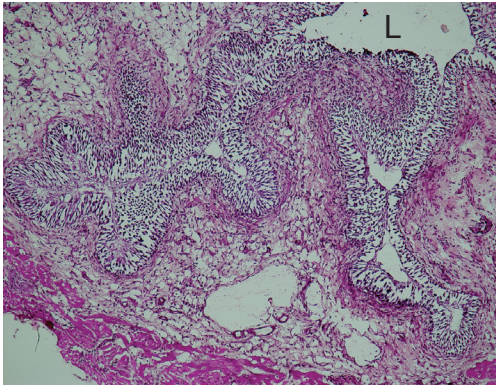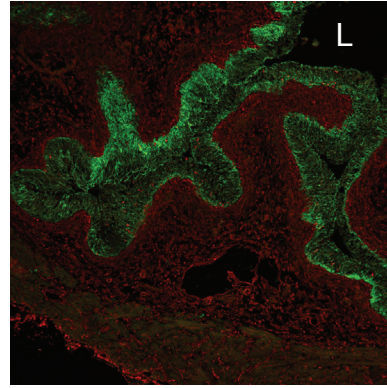

Bladder #3

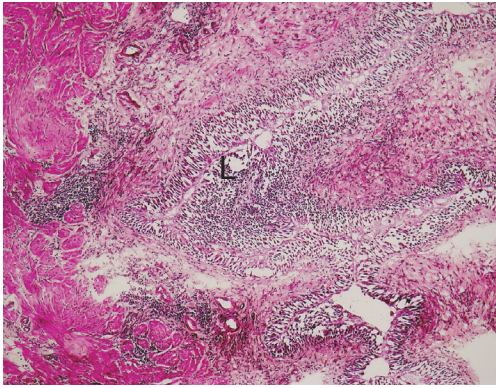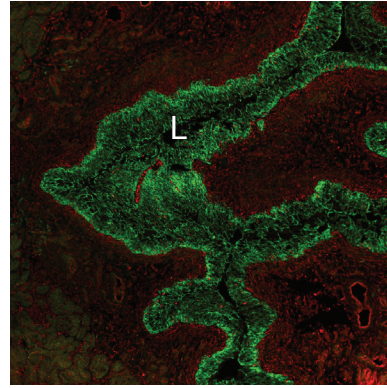

Bladder #4

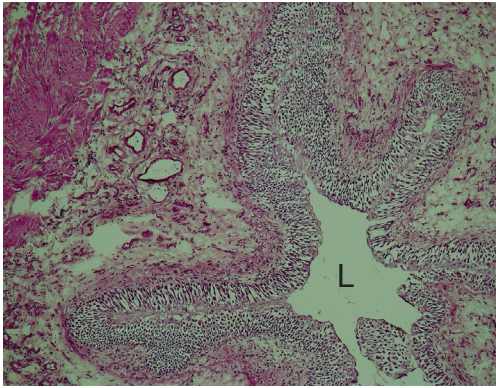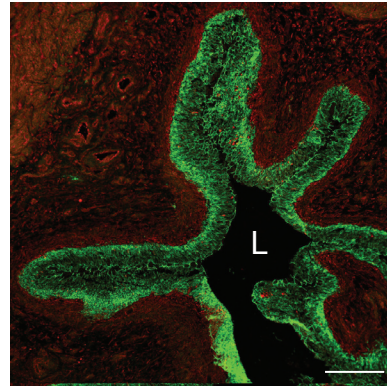

**b**

*Shh*<sup>CreER/WT</sup>; *R26*<sup>mTmG/WT</sup>  
(BBN for 6 months; TM at 0 month)

H&E

mEGFP/mTomato

Bladder #1

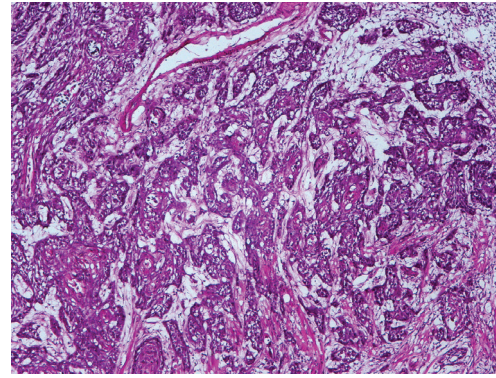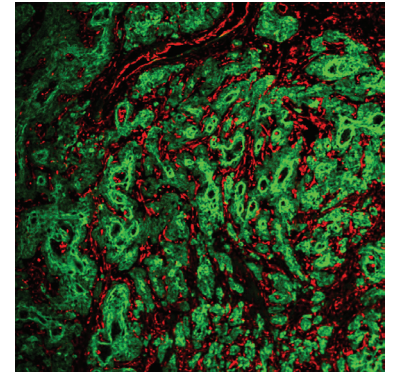

Bladder #2

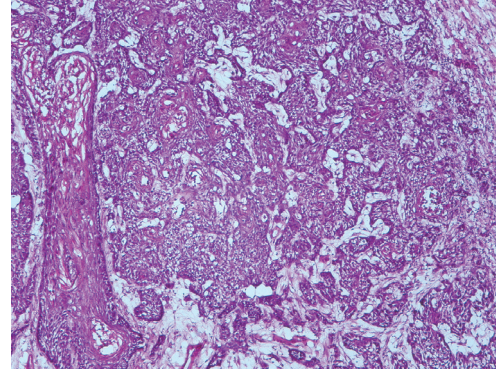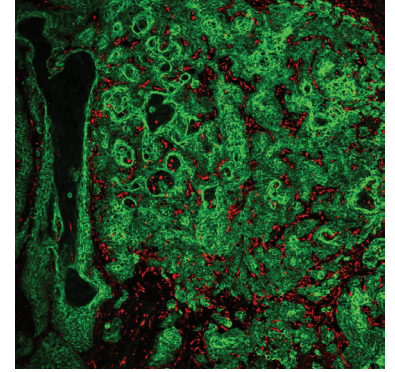

Bladder #3

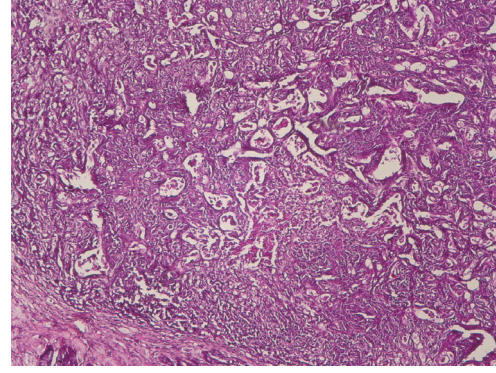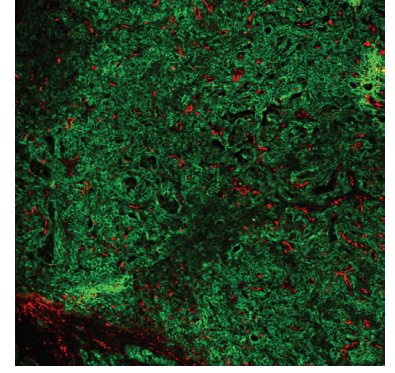

Bladder #4

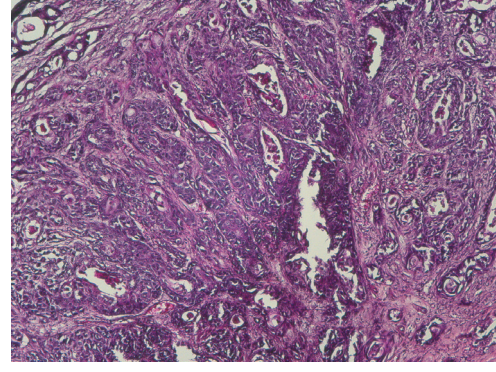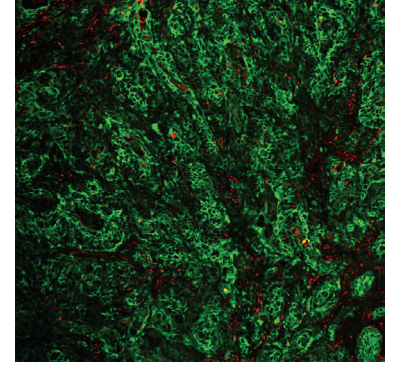

Bladder #5

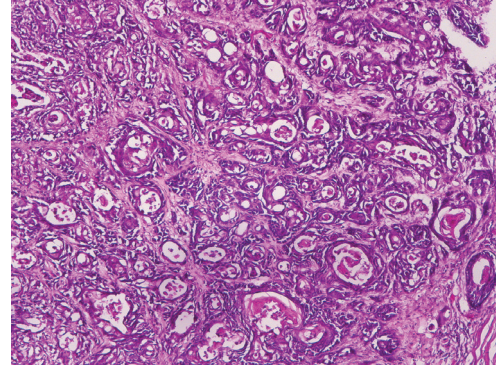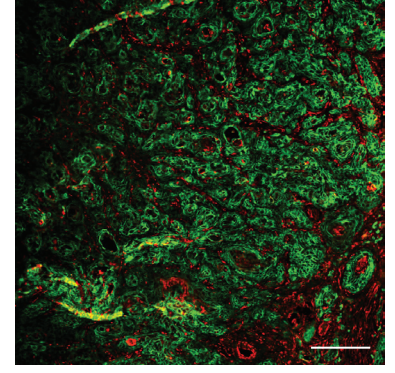

Supplement: NIHMS579569-supplement-4.pdf [file NIHMS579569-supplement-4.pdf]
