# Supplementary material
Source: PubMed Central journal article supplement (PMC4196946)

# Supplementary Figure 4

*Shh*<sup>CreER/WT</sup>; *R26*<sup>DTA/WT</sup>

TM at 0 month; BBN for 8 months

No TM; BBN for 6 months

Bladder #1

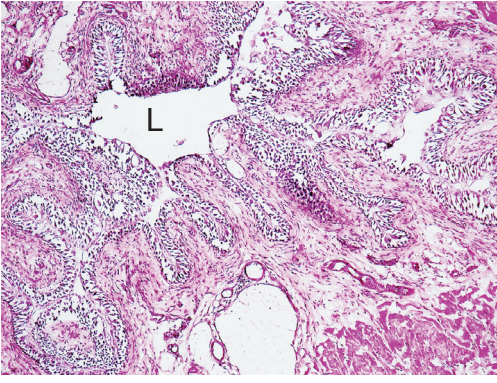

Bladder #7

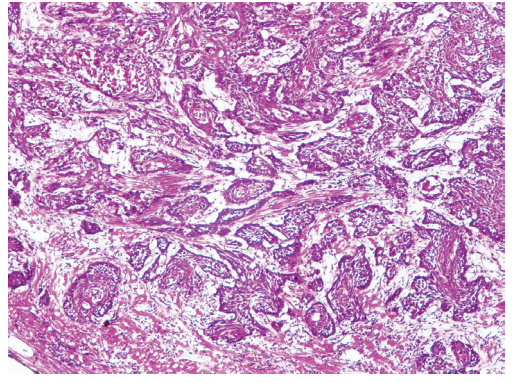

Bladder #2

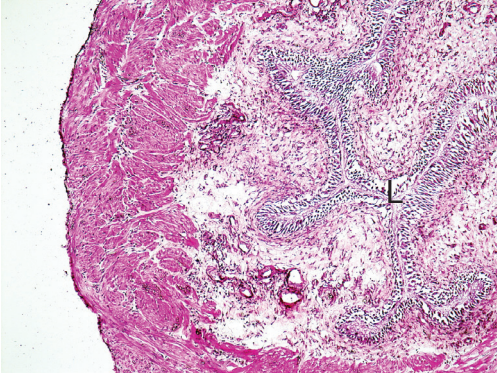

Bladder #8

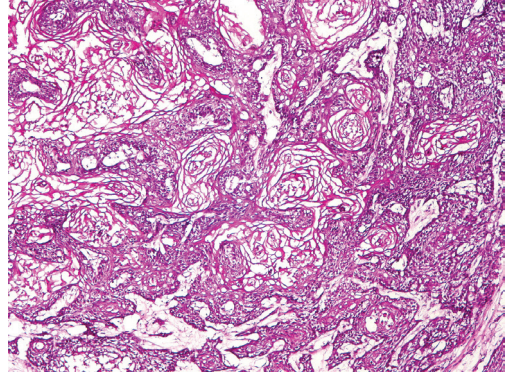

Bladder #3

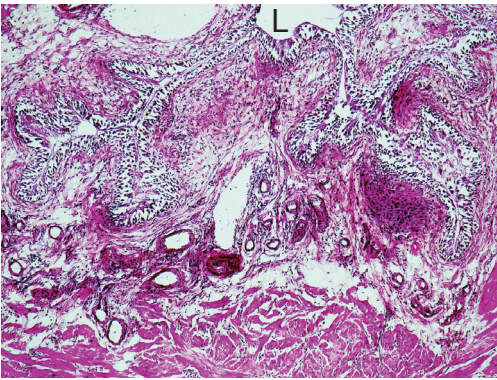

Bladder #9

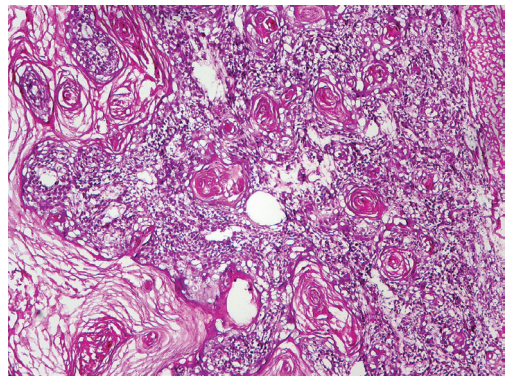

Bladder #4

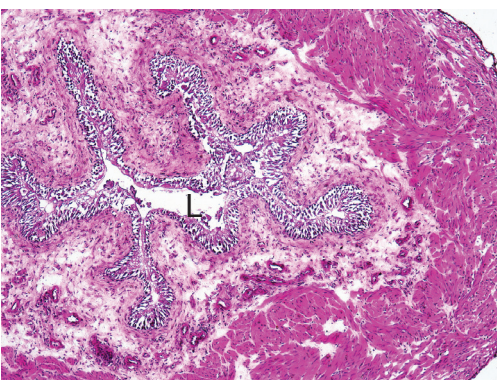

Bladder #10

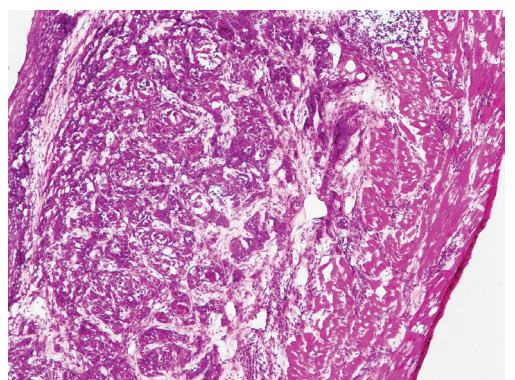

Bladder #5

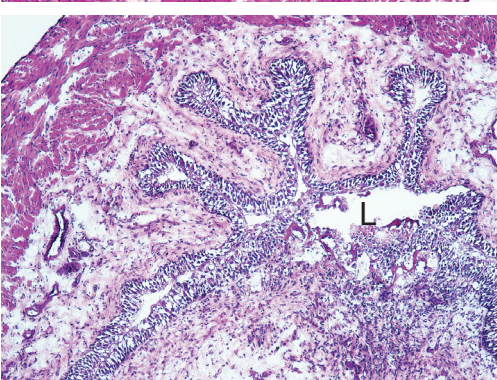

Bladder #11

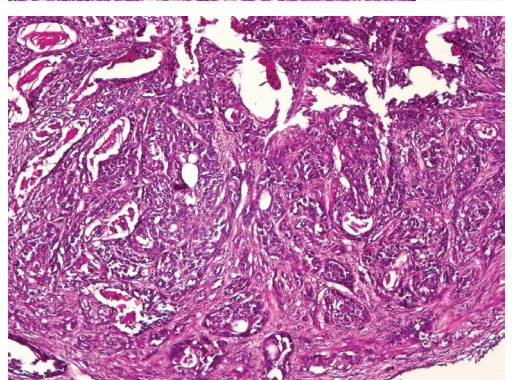

Bladder #6

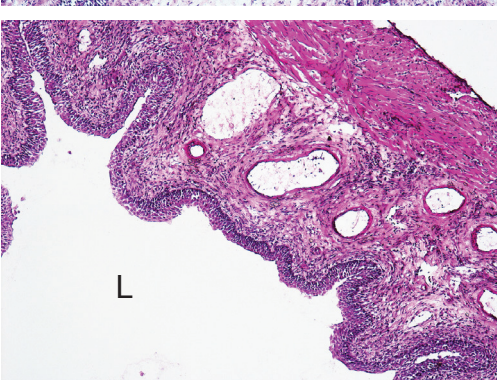

Bladder #12

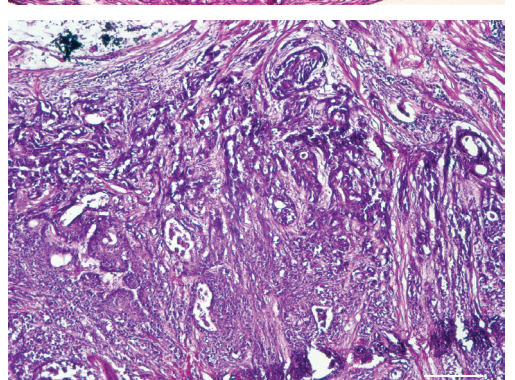

Supplement: NIHMS579569-supplement-5.pdf [file NIHMS579569-supplement-5.pdf]
