# Supplementary material
Source: PubMed Central journal article supplement (PMC4196946)

**a**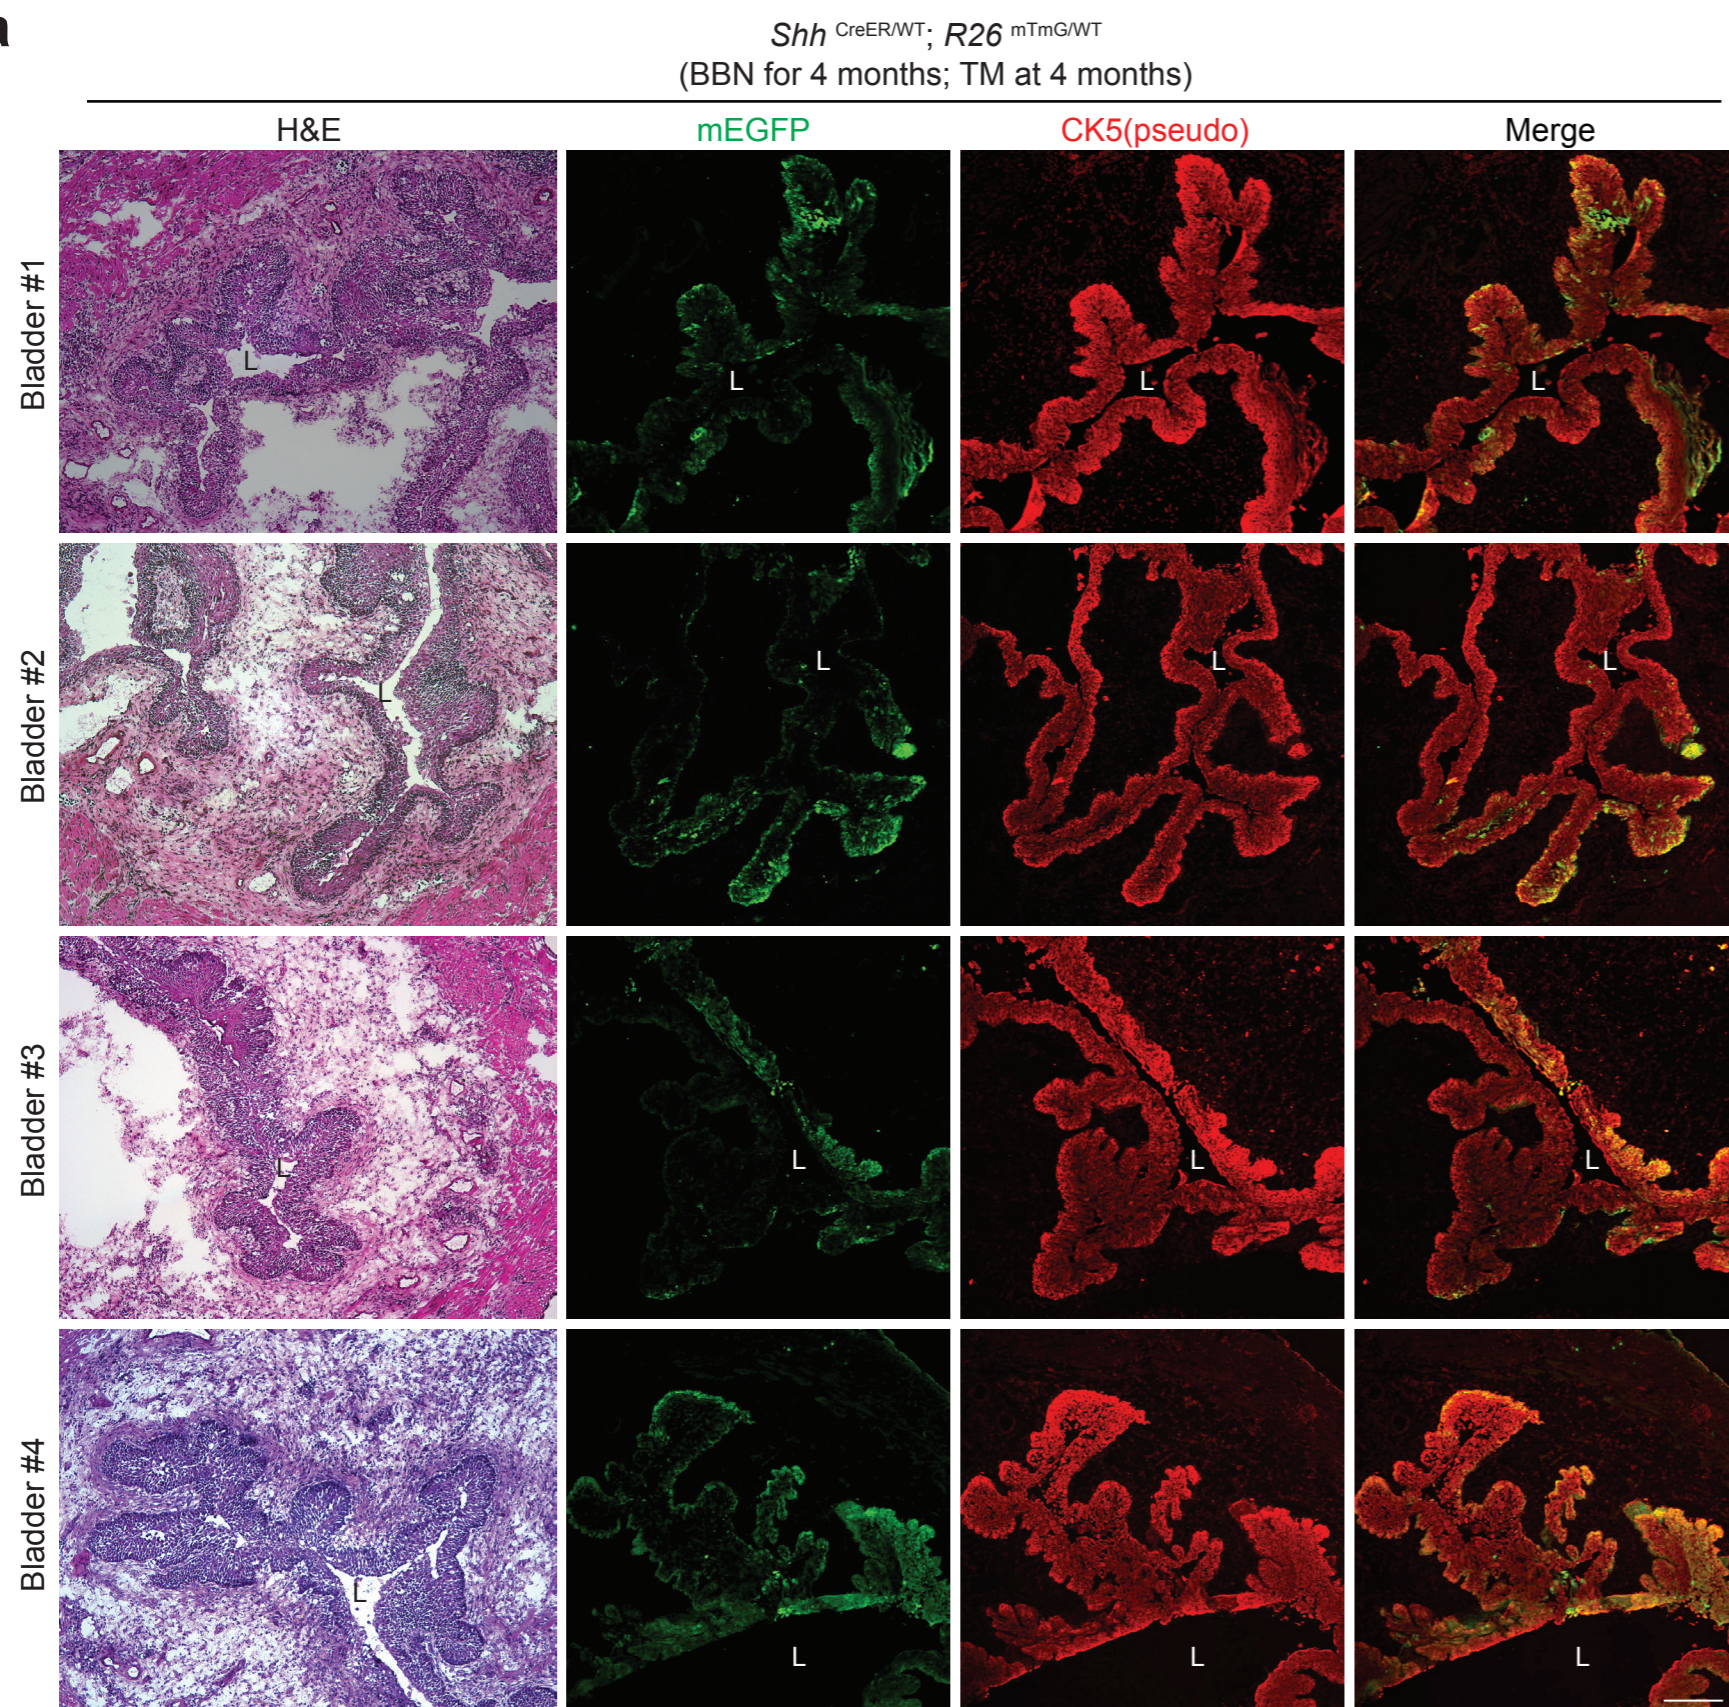**b**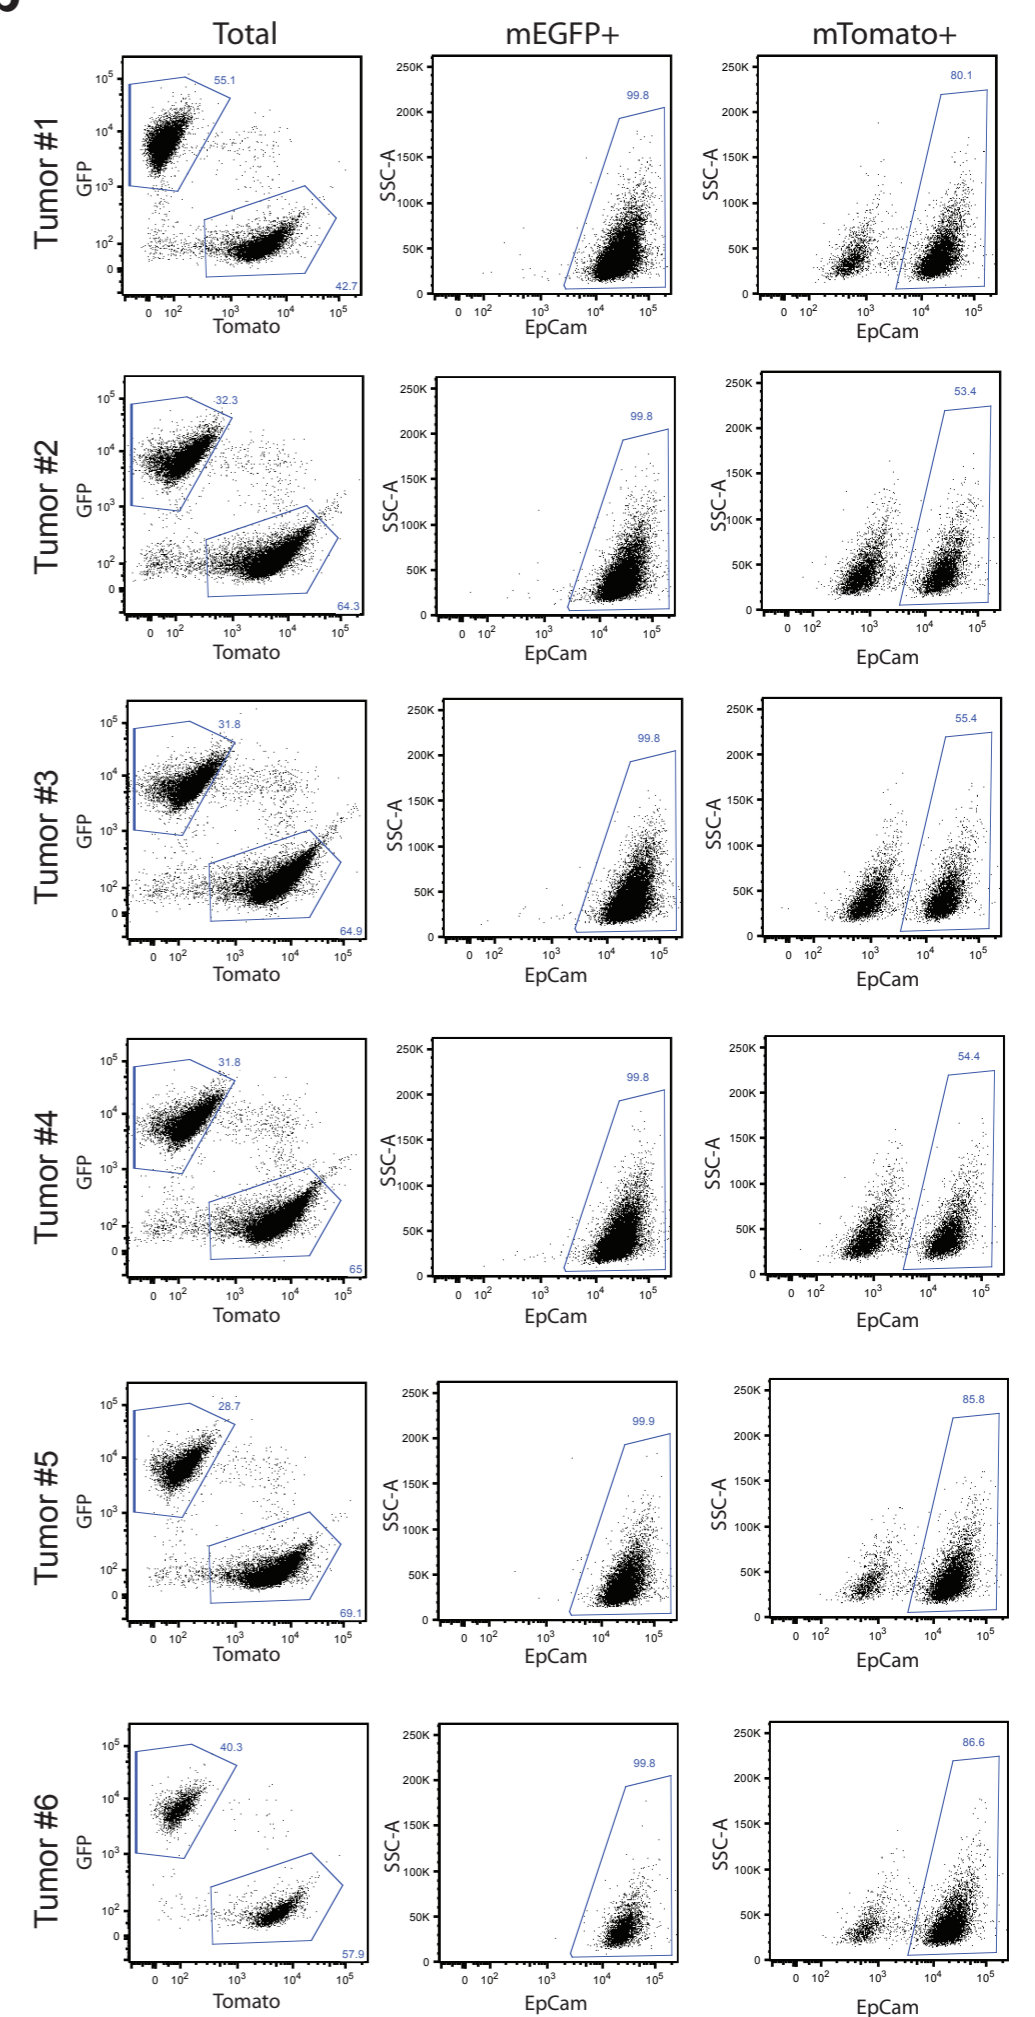**c**

Orthotopic model of  
BBN induced tumor

Tumor injection into the wall of bladder  
from immunocompromised mouse

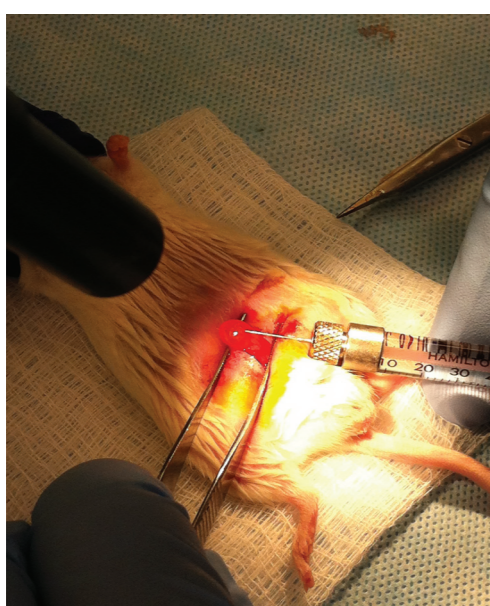**d**

Orthotopic allografts of mEGFP positive BBN induced tumor  
(*Shh*<sup>CreER/WT</sup>; *R26*<sup>mTmG/WT</sup>; BBN for 6 months; TM at 4 months)

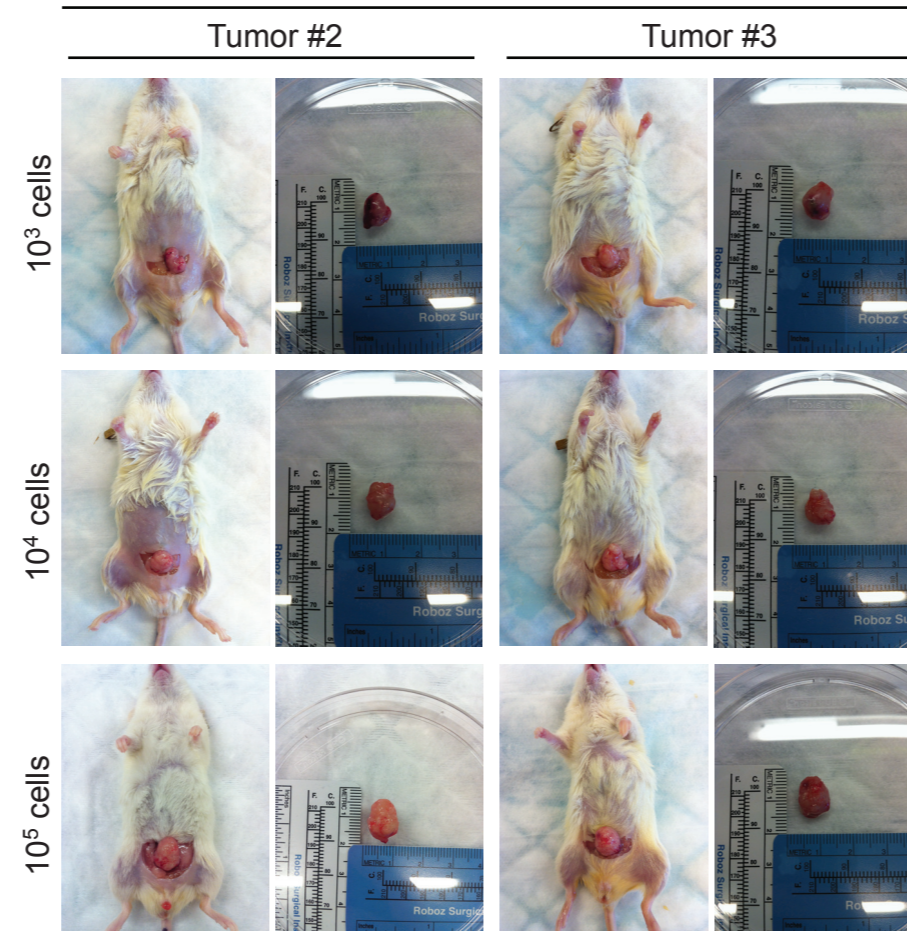

Orthotopic allografts of mTomato positive BBN induced tumor  
(*Shh*<sup>CreER/WT</sup>; *R26*<sup>mTmG/WT</sup>; BBN for 6 months; TM at 4 months)

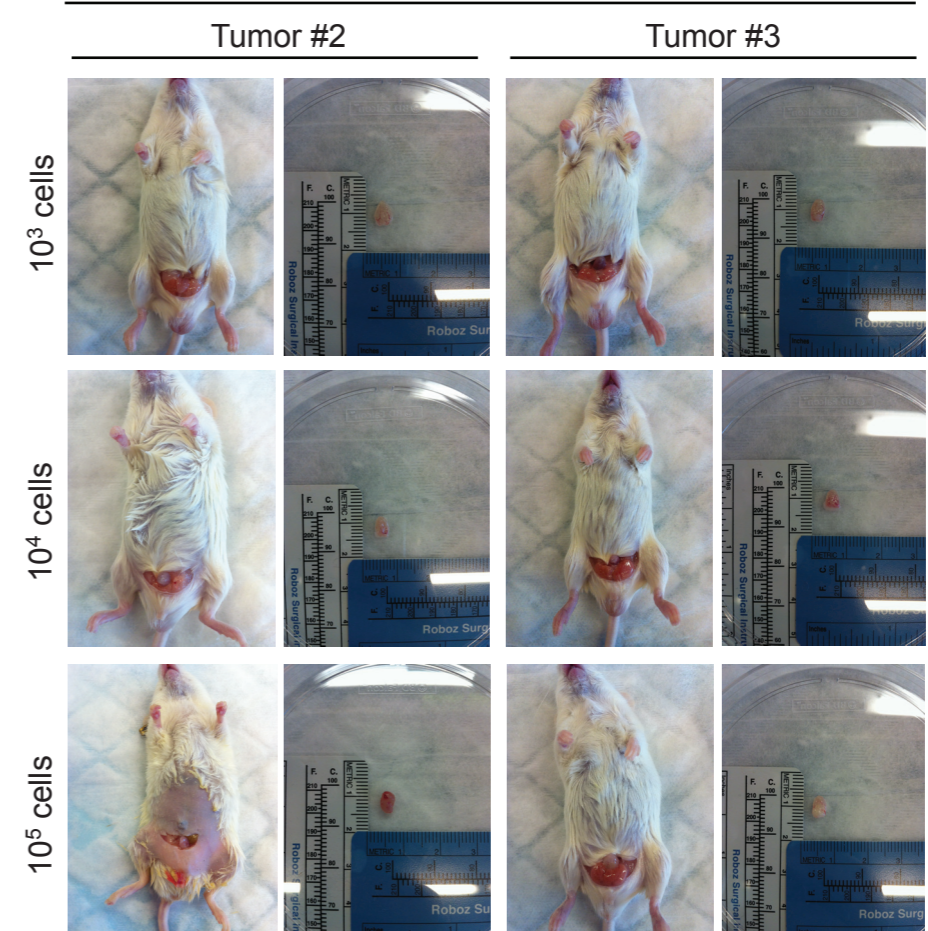

Supplement: NIHMS579569-supplement-6.pdf [file NIHMS579569-supplement-6.pdf]
