# Supplementary material
Source: PubMed Central journal article supplement (PMC4196946)

# Supplementary Figure 6

**a**

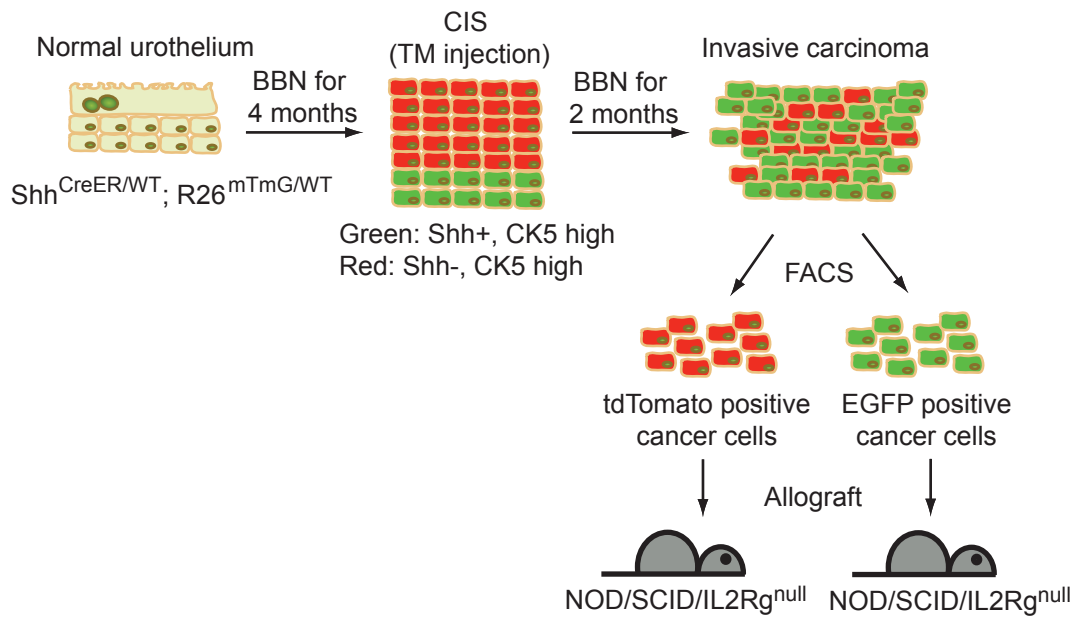

**b**

Allografts of EGFP or tdTomato positive BBN induced tumor ( $Shh^{CreER/WT}; R26^{mTmG/WT}$ ; BBN for 6 months; TM at 4 months)

Transplantation of Tomato positive cancer cells

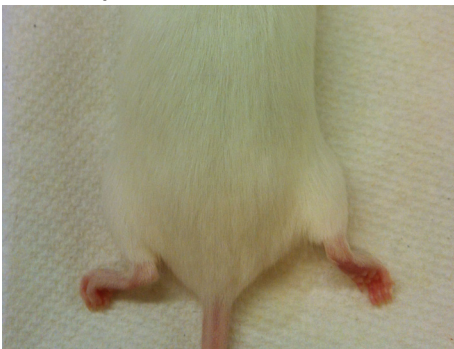

Transplantation of EGFP positive cancer cells

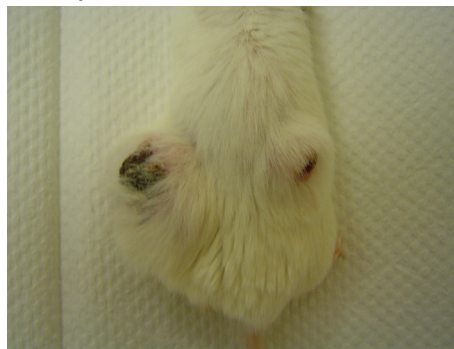

**c**

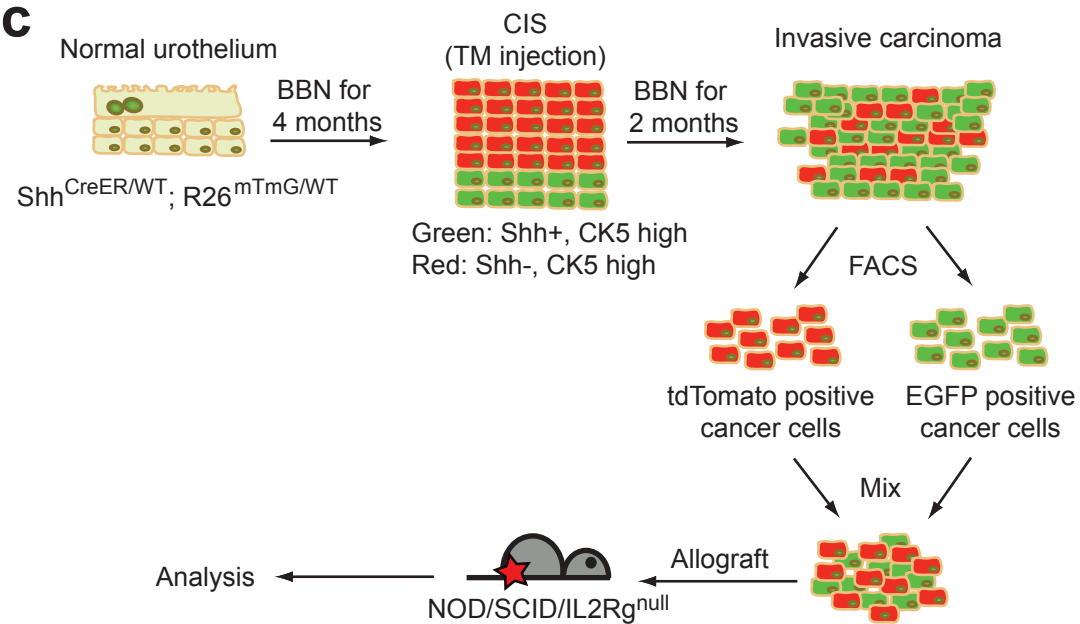

**d**

Allograft of mixed cancer cells containing two different populations ( $Shh^{CreER/WT}; R26^{mTmG/WT}$ ; BBN for 6 months; TM at 4 months)

H&E

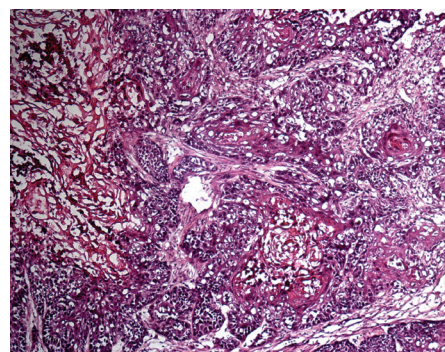

EGFP/DAPI

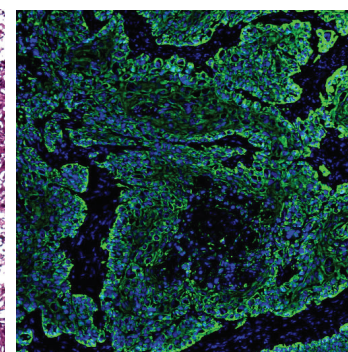

tdTomato/DAPI

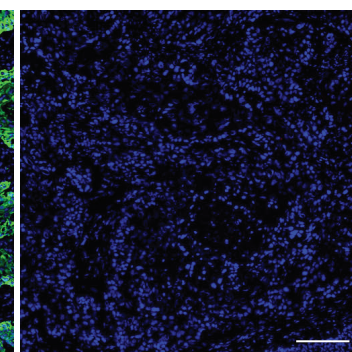

Supplement: NIHMS579569-supplement-7.pdf [file NIHMS579569-supplement-7.pdf]
