# Supplementary material
Source: PubMed Central journal article supplement (PMC4196946)

# Supplementary Figure 8

**a**

*Actin*<sup>CreER/WT</sup>; *R26*<sup>Rainbow/WT</sup> (Bladder at 0 month; TM at 0 month)

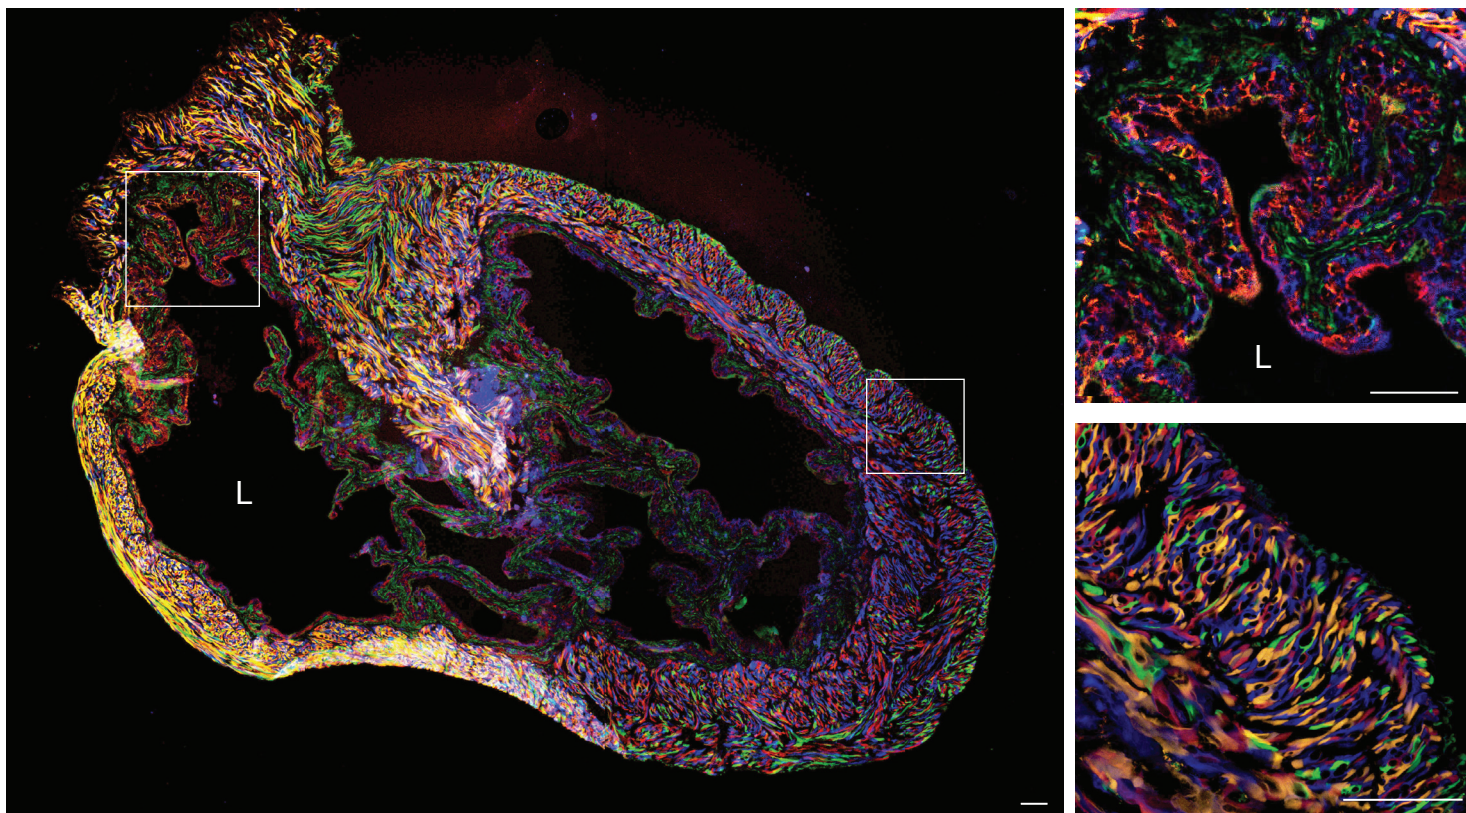

**b**

*Actin*<sup>CreER/WT</sup>; *R26*<sup>Rainbow/WT</sup> (Intestine at 4 months; TM at 0 month)

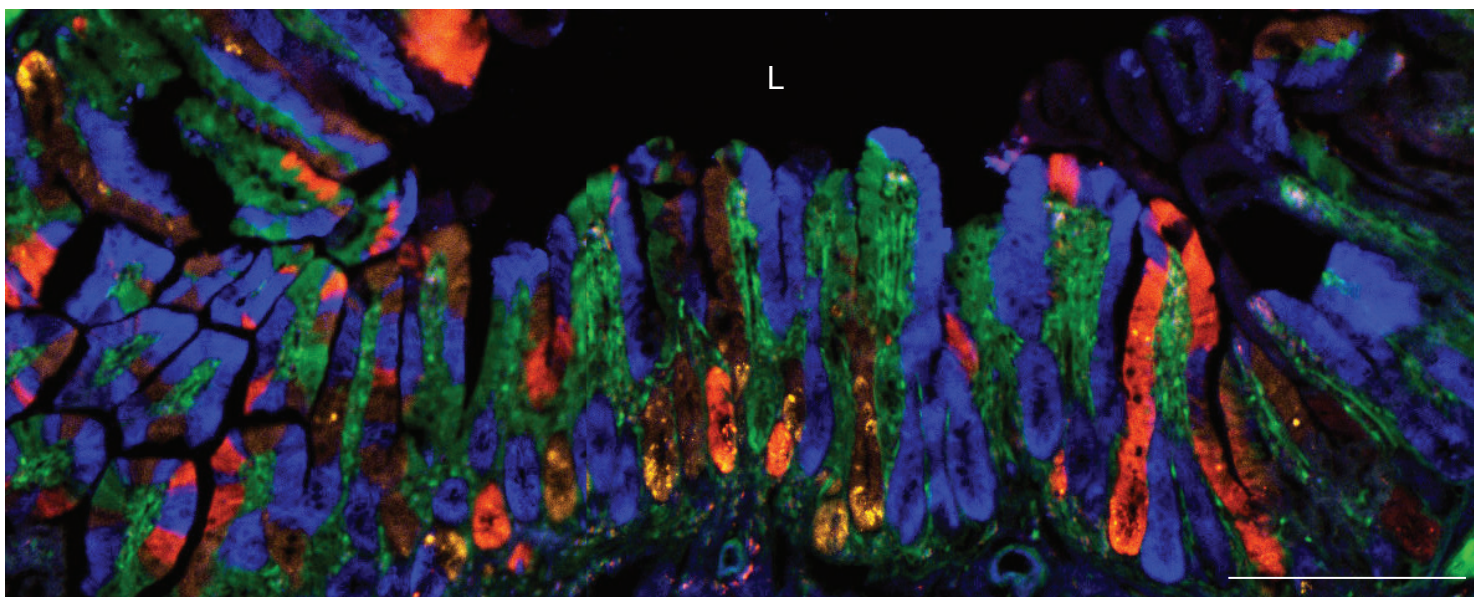

Supplement: NIHMS579569-supplement-9.pdf [file NIHMS579569-supplement-9.pdf]
