# Supplementary material
Source: PubMed Central journal article supplement (PMC4196946)

# Supplementary Figure 1

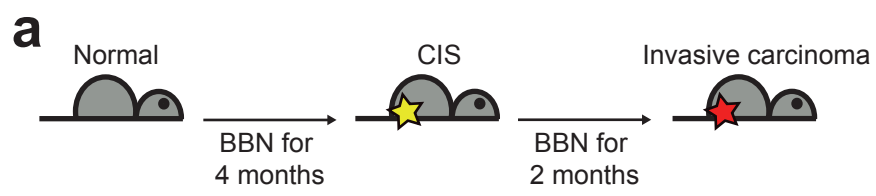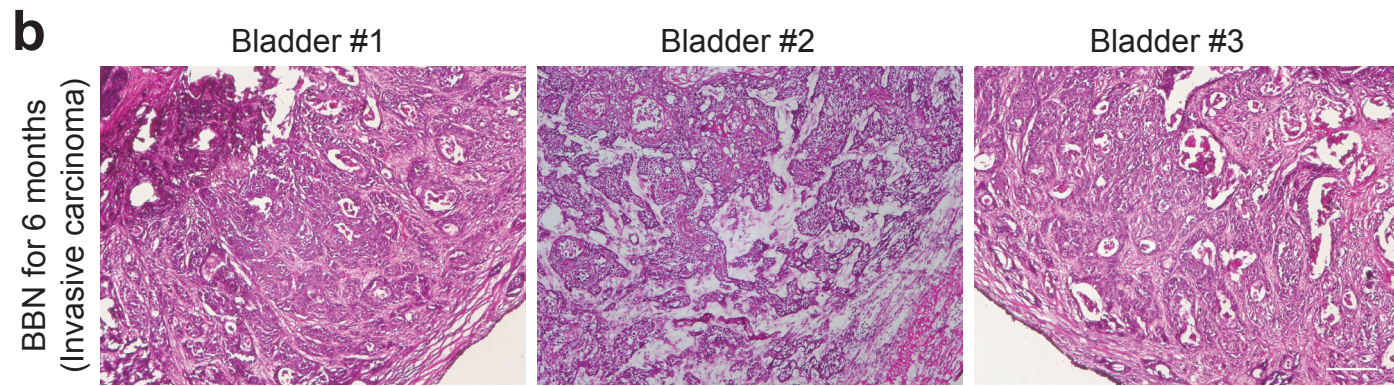

Supplement: NIHMS579569-supplement-2.pdf [file NIHMS579569-supplement-2.pdf]

# Supplementary Figure 2

Bladder exposed to BBN for 5 weeks

Ki67/Laminin/DAPI

CK5/Laminin/DAPI

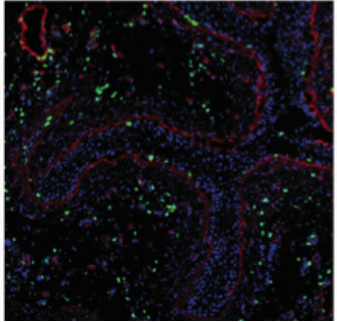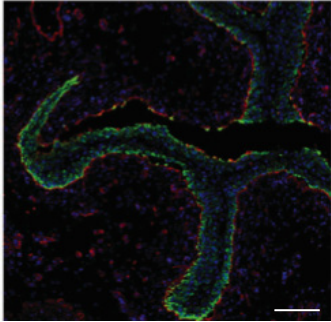

Supplement: NIHMS579569-supplement-3.pdf [file NIHMS579569-supplement-3.pdf]

**a**

Invasive carcinoma (BBN for 6 months)

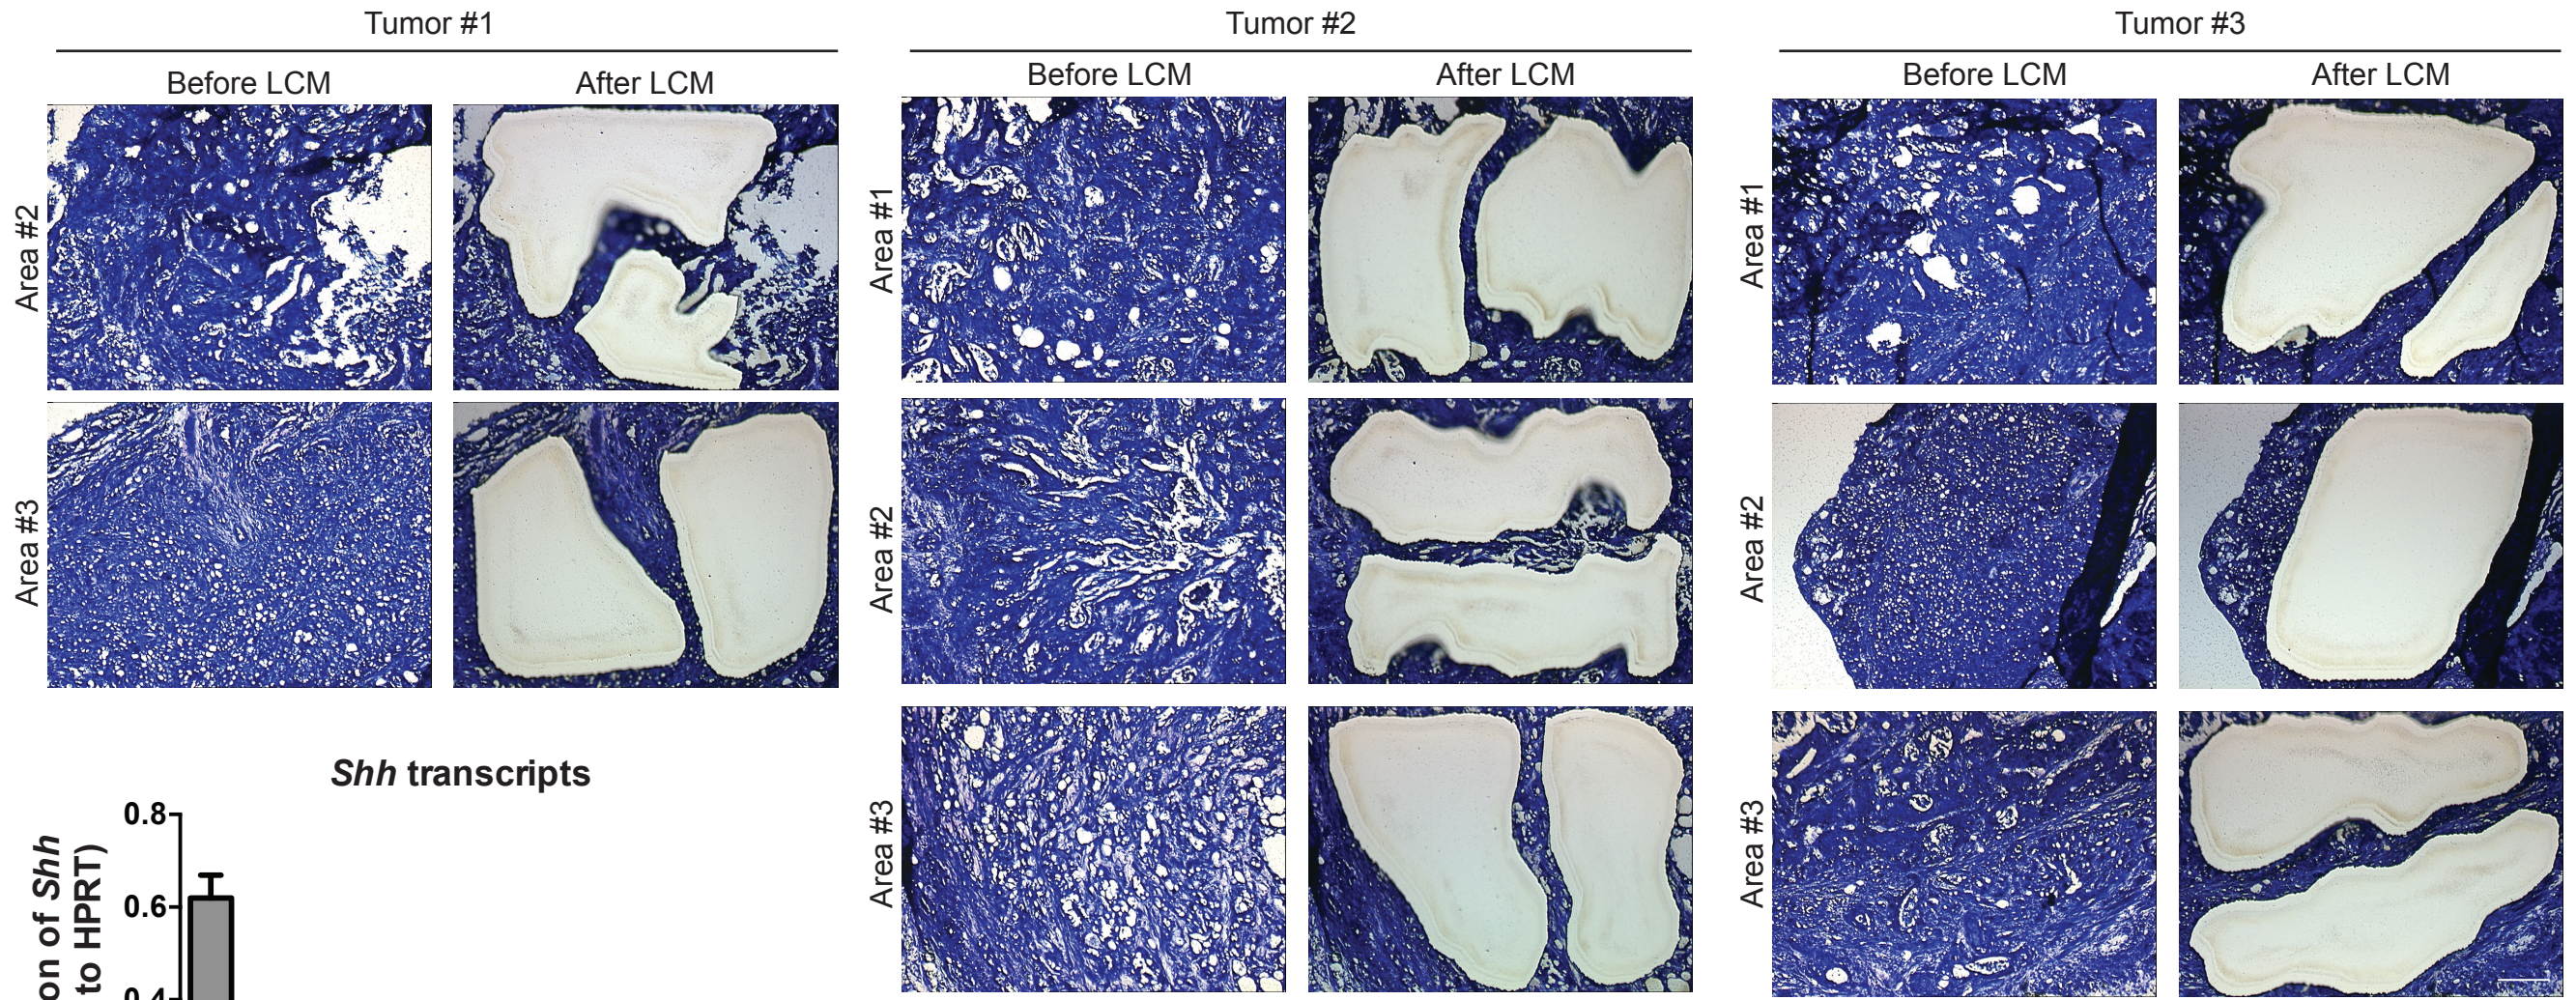

**b**

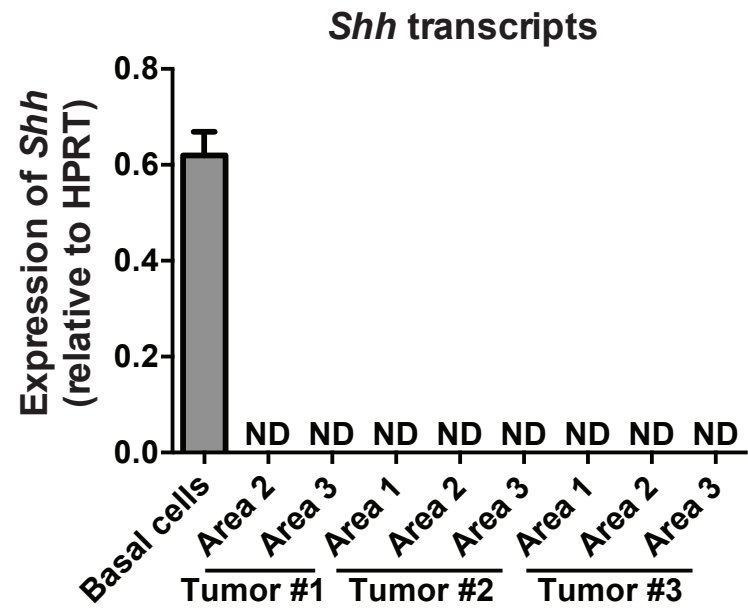

Supplement: NIHMS579569-supplement-8.pdf [file NIHMS579569-supplement-8.pdf]
